# Supplementary material
Source: PubMed Central journal article supplement (PMC3225249)

Figure Suppl.: Double staining of E29 brain cells with nNOS and NeuN antibody. A. Gate setting for FITC isotype antibody control. Cells were stained with normal goat IgG as primary antibody and donkey anti-goat-FITC as secondary antibody. P2 was assigned as FITC-positive gate. A similar gate was also set for the APC channel (data not shown). The lowest histogram shows the population of P2 on the APC channel. P3 was assigned for APC-positive cells that were considered NeuN-positive cells. B. Representative data of E29 fetal brain showing double staining for both NeuN and nNOS-positive cells. 15% of the cells stained positive for nNOS and 99.6% of those nNOS-positive cells stained positive for NeuN.

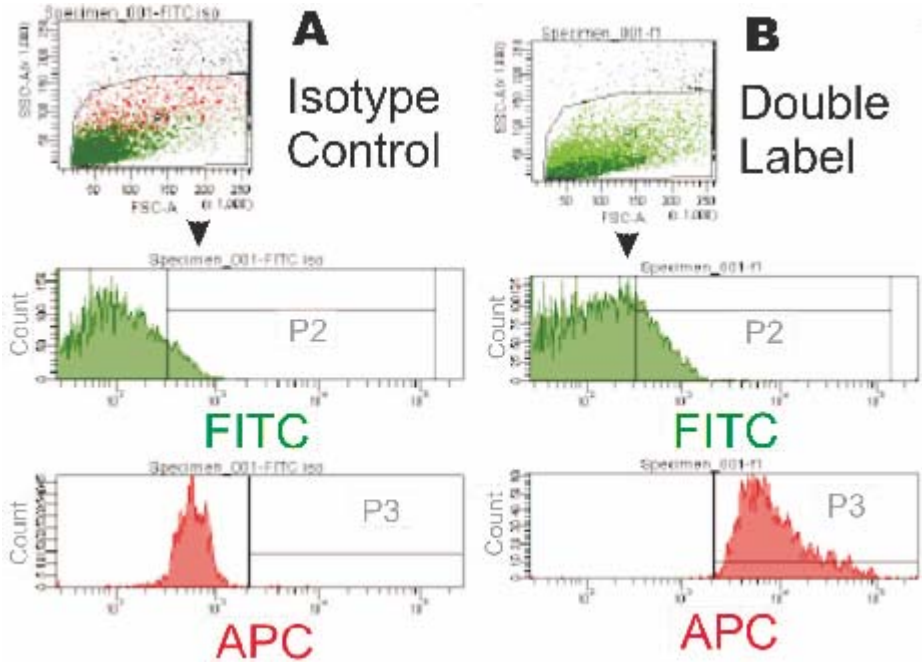

Supplement: dne0033-0288-s01.pdf [file dne0033-0288-s01.pdf]
